# Supplementary material for: Three-dimensional Cd(ii) porphyrin metal–organic frameworks for the colorimetric sensing of Electron donors
Source: Royal Society of Chemistry journal article supplement (doi:10.1039/d2ce00103a), 2022-01-01
Supplement: d2ce00103a1.pdf [file d2ce00103a1.pdf]

**Electronic Supplementary Information for:**

**Three-dimensional Cd(II) Porphyrin Metal-Organic Frameworks for the  
Colorimetric Sensing of Electron Donors**

*Hui Min Tay,<sup>a,b</sup> Emily J. Goddard<sup>a,c</sup> and Carol Hua<sup>a,d\*</sup>*

- a) School of Chemistry, The University of Melbourne, Parkville, Victoria, 3010, Australia.  
b) Department of Chemistry, The University of Oxford, OX1 3TA, United Kingdom  
c) Department of Chemistry, The University of Sheffield, S10 2TN, United Kingdom,  
d) School of Life and Environmental Sciences, Deakin University, Waurn Ponds, Victoria, 3216,  
Australia. \*E-mail: [c.hua@deakin.edu.au](mailto:c.hua@deakin.edu.au).

**Table of Contents**

|                                                                                                                                                                |           |
|----------------------------------------------------------------------------------------------------------------------------------------------------------------|-----------|
| <b>Table S1.</b> Crystallographic parameters compounds <b>1-3</b> in this study.....                                                                           | <b>S2</b> |
| <b>Table S2.</b> Analysis of the possible coordination geometries using the SHAPE program for the 7-<br>coordinate M(II) centres in compounds <b>1-3</b> ..... | <b>S3</b> |
| <b>Figures S1.</b> N <sub>2</sub> gas sorption isotherms at 77 K.....                                                                                          | <b>S3</b> |
| <b>Figures S2.</b> ATR-FTIR spectra for compounds <b>1-3</b> .....                                                                                             | <b>S4</b> |
| <b>Figures S3-5.</b> Calculated and experimental PXRD patterns for compounds <b>1-3</b> .....                                                                  | <b>S4</b> |
| <b>Figures S6-9.</b> Thermal Gravimetric Analysis plots for compounds <b>1-3</b> .....                                                                         | <b>S6</b> |
| <b>Figure S10.</b> Solid state UV-Vis-NIR spectra.....                                                                                                         | <b>S8</b> |
| <b>Figure S11.</b> Photos of the colour change of <b>1-3</b> upon exposure to triethylamine, tripropylamine and<br>aniline.....                                | <b>S8</b> |
| <b>Figure S12.</b> Normalised Vis-NIR spectra <b>1-3</b> upon exposure to ferrocene (red), TTF (blue) and<br>xylene (green) vapour.....                        | <b>S9</b> |

**Table S1.** Crystal data and structure refinement details for **1**, **2** and **3** in this study.

|                                                              | [Cd <sub>2</sub> (CdTCPP)(bpe)(H <sub>2</sub> O)]<br>(1)                      | [Cd <sub>2</sub> (ZnTCPP)(bpe)(H <sub>2</sub> O)]<br>(2)                         | [Cd <sub>2</sub> (bpaz)(CdTCPP)H <sub>2</sub> O]<br>(3)                       |
|--------------------------------------------------------------|-------------------------------------------------------------------------------|----------------------------------------------------------------------------------|-------------------------------------------------------------------------------|
| Formula                                                      | C <sub>60</sub> H <sub>34</sub> Cd <sub>3</sub> N <sub>6</sub> O <sub>9</sub> | C <sub>60</sub> H <sub>34</sub> Cd <sub>2</sub> N <sub>6</sub> O <sub>9</sub> Zn | C <sub>58</sub> H <sub>32</sub> Cd <sub>3</sub> N <sub>8</sub> O <sub>9</sub> |
| M/g mol <sup>-1</sup>                                        | 1320.13                                                                       | 1273.10                                                                          | 1322.11                                                                       |
| Temperature (K)                                              | 100(2)                                                                        | 100(2)                                                                           | 100(2)                                                                        |
| Crystal system                                               | Tetragonal                                                                    | Tetragonal                                                                       | Tetragonal                                                                    |
| Space Group                                                  | <i>P4/m</i>                                                                   | <i>P4/m</i>                                                                      | <i>P4/m</i>                                                                   |
| Crystal size<br>(mm <sup>3</sup> )                           | 0.20 × 0.15 × 0.12                                                            | 0.16 × 0.08 × 0.06                                                               | 0.08 × 0.04 × 0.03                                                            |
| Crystal Colour                                               | Purple                                                                        | Purple                                                                           | Purple                                                                        |
| Crystal Habit                                                | Block                                                                         | Block                                                                            | Block                                                                         |
| <i>a</i> (Å)                                                 | 18.53870(10)                                                                  | 18.53870(10)                                                                     | 18.20082(11)                                                                  |
| <i>b</i> (Å)                                                 | 18.53870(10)                                                                  | 18.53870(10)                                                                     | 18.20082(11)                                                                  |
| <i>c</i> (Å)                                                 | 16.41120(10)                                                                  | 16.41120(10)                                                                     | 16.58899(13)                                                                  |
| <i>V</i> (Å <sup>3</sup> )                                   | 5640.26(7)                                                                    | 5640.26(7)                                                                       | 5495.43(8)                                                                    |
| <i>Z</i>                                                     | 2                                                                             | 2                                                                                | 2                                                                             |
| $\rho_{\text{calc}}$ (mg/mm <sup>3</sup> )                   | 0.777                                                                         | 0.750                                                                            | 0.799                                                                         |
| $\lambda$ (CuK $\alpha$ )                                    | 1.54178 Å                                                                     | 1.54178 Å                                                                        | 1.54178 Å                                                                     |
| $\mu$ (CuK $\alpha$ )                                        | 4.741 mm <sup>-1</sup>                                                        | 3.492 mm <sup>-1</sup>                                                           | 4.872 mm <sup>-1</sup>                                                        |
| Reflections<br>collected                                     | 93674/6268 [ $R_{\text{merge}} =$<br>0.0712, $R_{\text{sigma}} = 0.0247$ ]    | 73075/6277 [ $R_{\text{merge}} =$<br>0.0728, $R_{\text{sigma}} = 0.0305$ ]       | 71352/6053 [ $R_{\text{merge}} =$<br>0.0738, $R_{\text{sigma}} = 0.0265$ ]    |
| Data/parameters                                              | 6268/199                                                                      | 6277/199                                                                         | 6053/195                                                                      |
| Final R indexes<br>[all data]                                | $R_1 = 0.0863$ , $wR_2 = 0.2315$                                              | $R_1 = 0.0612$ , $wR_2 = 0.1799$                                                 | $R_1 = 0.0842$ , $wR_2 = 0.2185$                                              |
| Goodness-of-fit<br>on F <sup>2</sup>                         | 1.111                                                                         | 1.175                                                                            | 1.133                                                                         |
| Largest diff.<br>peak/hole (e <sup>-</sup> Å <sup>-3</sup> ) | -1.09, 2.13                                                                   | -1.22, 1.95                                                                      | -0.81, 1.51                                                                   |

**Table S2.** Analysis of the possible coordination geometries using the SHAPE program for the 7-coordinate M(II) centres in compounds **1-3**

| Geometry | Symmetry        | 1            | 2            | 3            |
|----------|-----------------|--------------|--------------|--------------|
| HP-7     | D <sub>7h</sub> | 31.737       | 31.522       | 31.466       |
| HPY-7    | C <sub>6v</sub> | 21.003       | 21.088       | 20.836       |
| PBPY-7   | D <sub>5h</sub> | 8.616        | 8.606        | 8.532        |
| COC-7    | C <sub>3v</sub> | 3.906        | 3.912        | 3.807        |
| CTPR-7   | C <sub>2v</sub> | <b>2.810</b> | <b>2.775</b> | <b>2.725</b> |
| JPBPY-7  | D <sub>5h</sub> | 12.684       | 12.678       | 12.698       |
| JETPY-7  | C <sub>3v</sub> | 18.242       | 18.171       | 18.591       |

HP-7 = Heptagon; HPY-7 = Hexagonal pyramid; PBPY-7 = Pentagonal bipyramid; COC-7 = Capped octahedron; CTPR-7 = Capped trigonal prism; JPBPY = Johnson pentagonal bipyramid J13; JETPY-7 = Johnson elongated triangular pyramid J7. The minima values are indicated in bold.

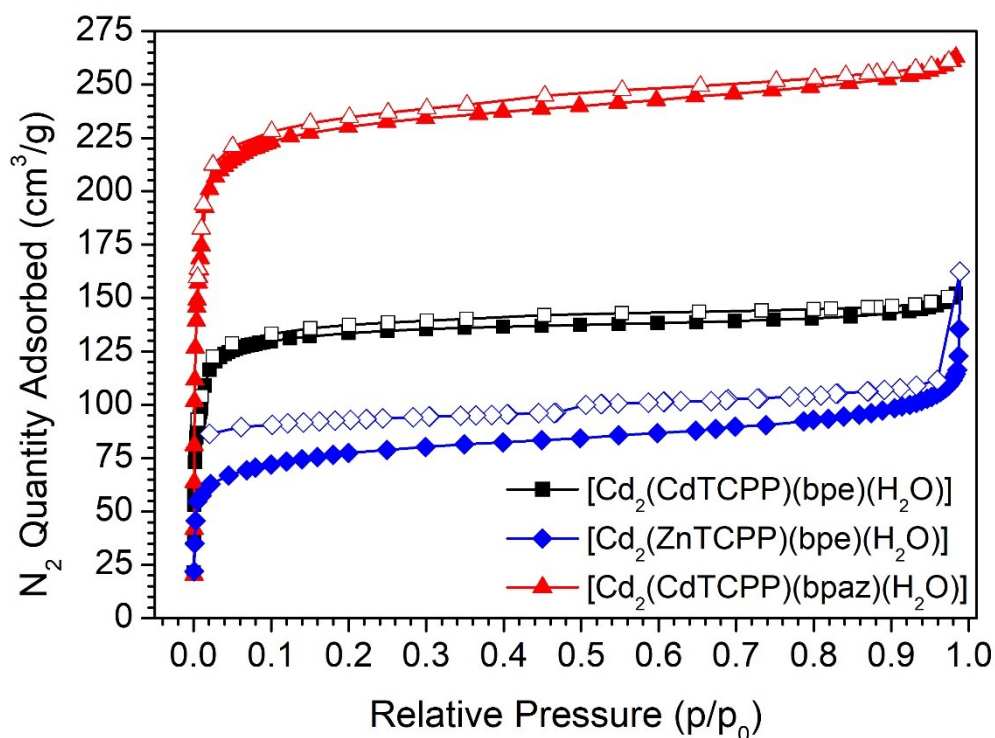

**Figure S1.** Nitrogen gas sorption isotherms collected at 77 K for [Cd<sub>2</sub>(bpe)(CdTCPP)(H<sub>2</sub>O)] (**1**), [Cd<sub>2</sub>(bpe)(ZnTCPP)(H<sub>2</sub>O)] (**2**) and [Cd<sub>2</sub>(bpaz)(CdTCPP)(H<sub>2</sub>O)] (**3**) where the filled symbols show the adsorption isotherm and hollow symbols show the desorption isotherm.

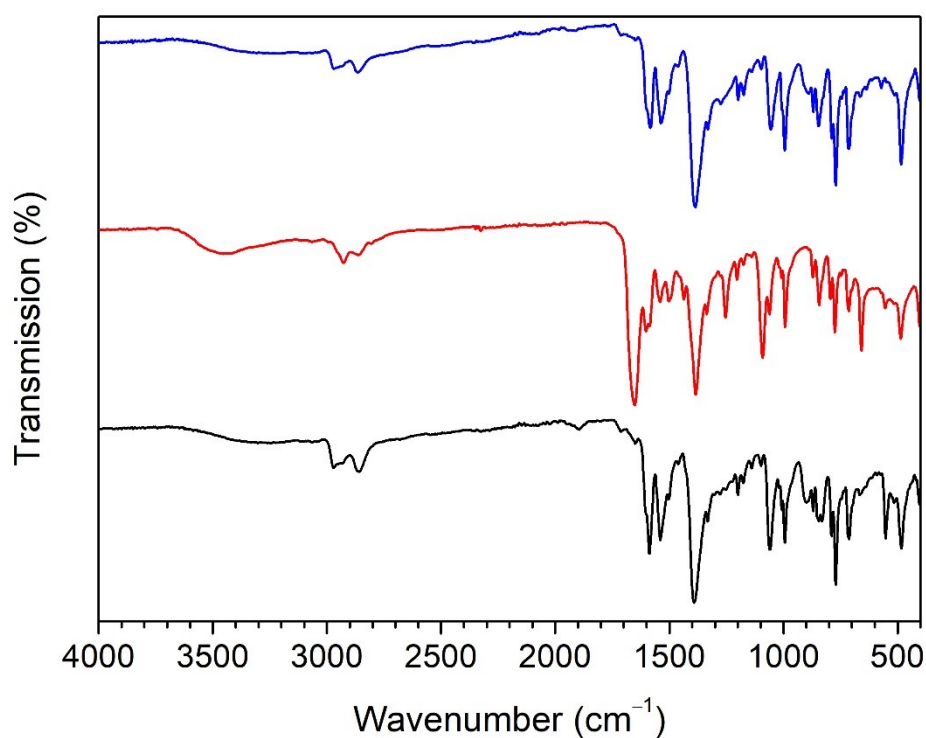

**Figure S2.** ATR Fourier transform infrared spectra (FT-IR) of  $[\text{Cd}_2(\text{CdTCPP})(\text{bpe})(\text{H}_2\text{O})]$  (1) (black),  $[\text{Cd}_2(\text{ZnTCPP})(\text{bpe})(\text{H}_2\text{O})]$  (2) (red),  $[\text{Cd}_2(\text{CdTCPP})(\text{bpaz})(\text{H}_2\text{O})]$  (3) (blue) between 4000 and 400  $\text{cm}^{-1}$ .

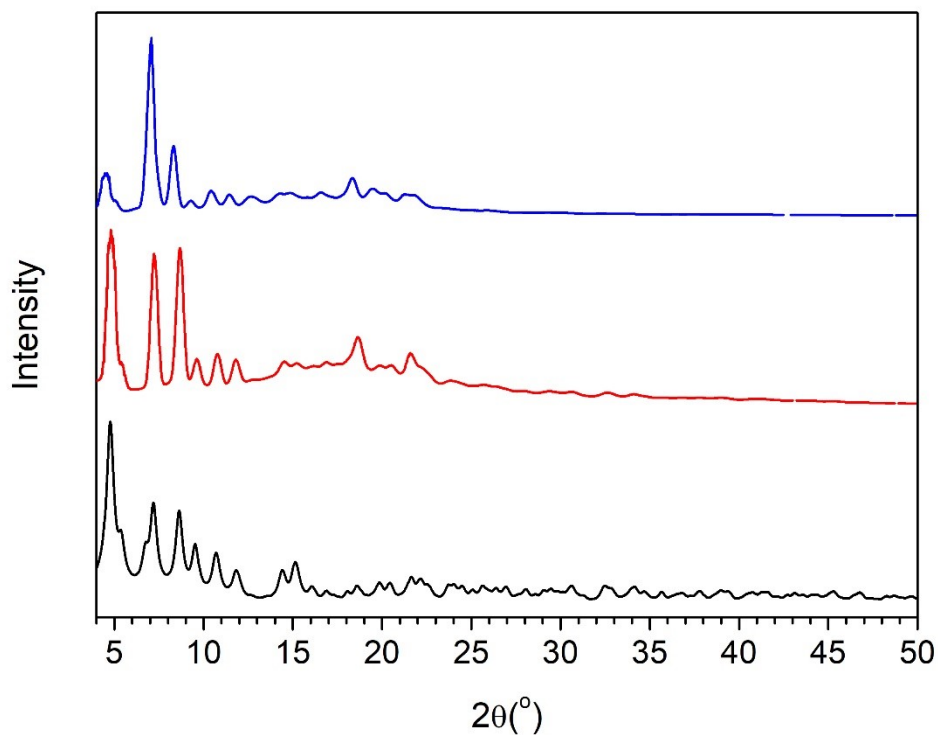

**Figure S3.** PXRD patterns of  $[\text{Cd}_2(\text{CdTCPP})(\text{bpe})(\text{H}_2\text{O})]$  (1), calculated (black), as synthesised (red) and desolvated (blue) between 5 and 50°  $2\theta$ .

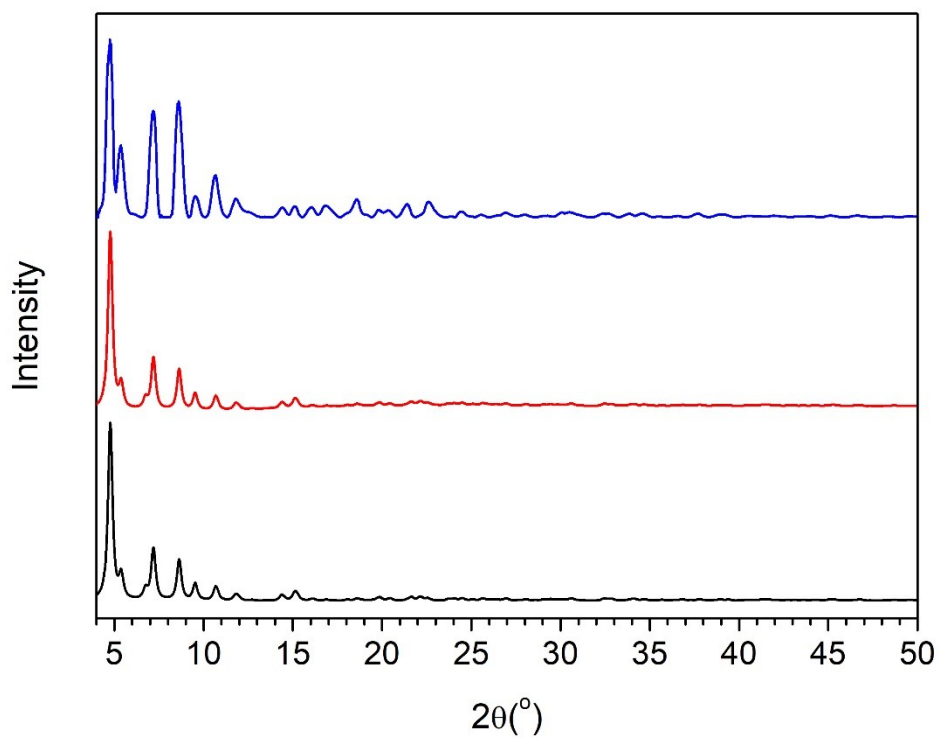

**Figure S4.** PXRD patterns of  $[\text{Cd}_2(\text{ZnTCPP})(\text{bpe})(\text{H}_2\text{O})]$  (**2**), calculated (black), as synthesised (red) and desolvated (blue) between 5 and  $50^\circ 2\theta$ .

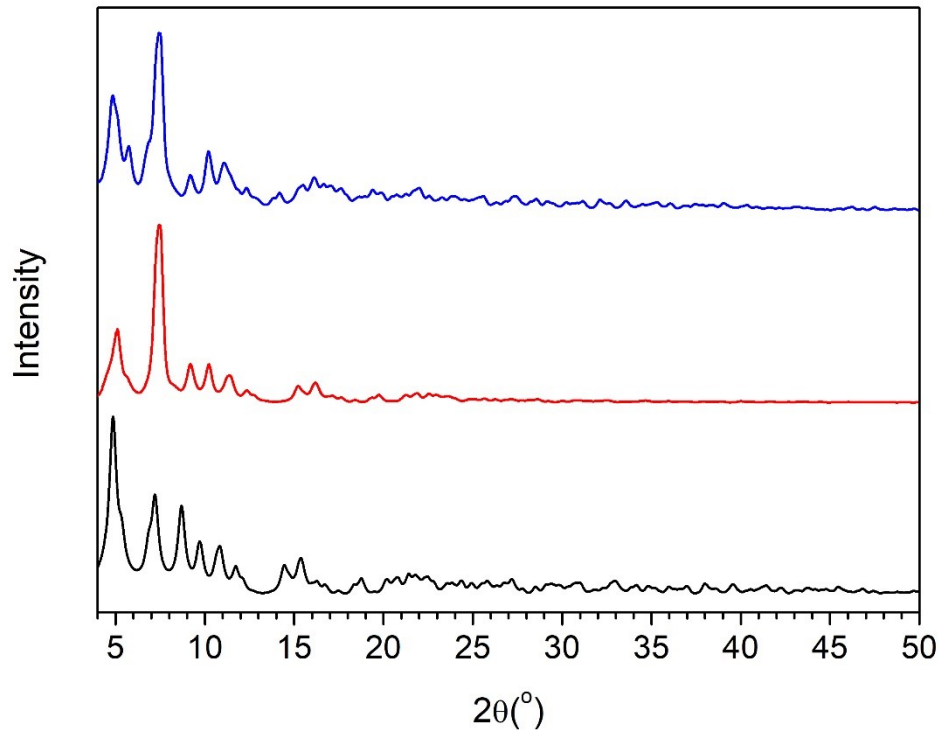

**Figure S5.** PXRD patterns of  $[\text{Cd}_2(\text{bpaz})(\text{CdTCPP})\text{H}_2\text{O}]$ , calculated, as synthesised, solvent exchanged with THF and desolvated between 5 and  $50^\circ 2\theta$ .

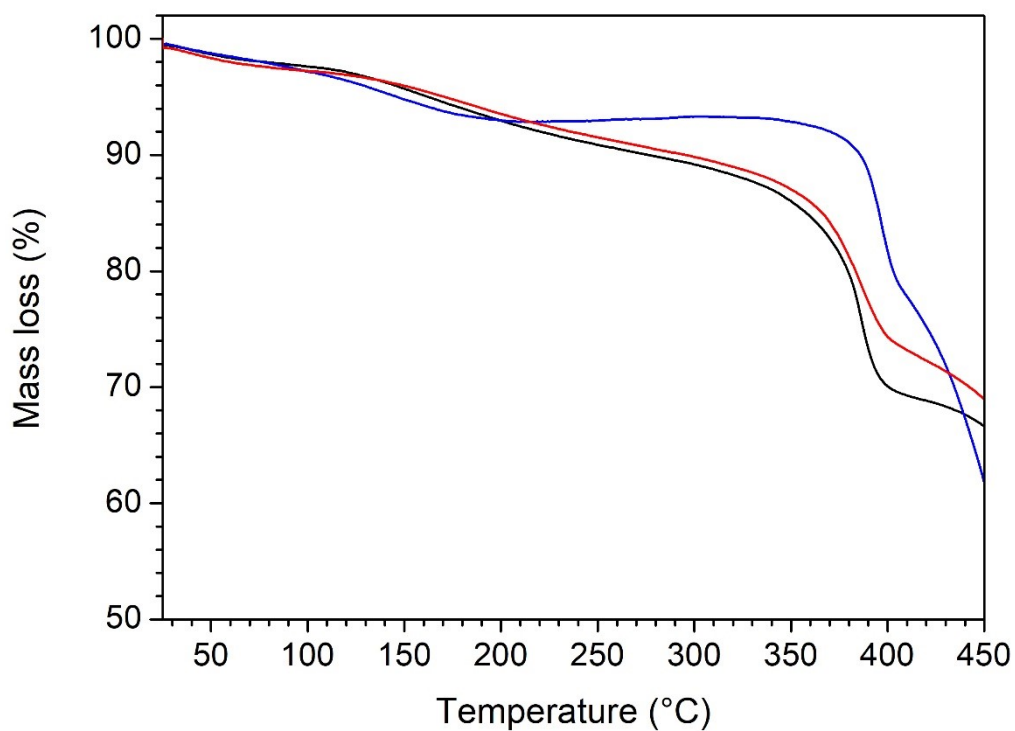

**Figure S6.** Thermal Gravimetric Analysis (TGA) of  $[\text{Cd}_2(\text{CdTCPP})(\text{bpe})(\text{H}_2\text{O})]$  (1) (black),  $[\text{Cd}_2(\text{CdTCPP})(\text{bpaz})(\text{H}_2\text{O})]$  (3) (red),  $[\text{Cd}_2(\text{ZnTCPP})(\text{bpe})(\text{H}_2\text{O})]$  (2) (blue) under  $\text{N}_2$  between 25 and 450 °C, heated at a rate of 5 °C/min.

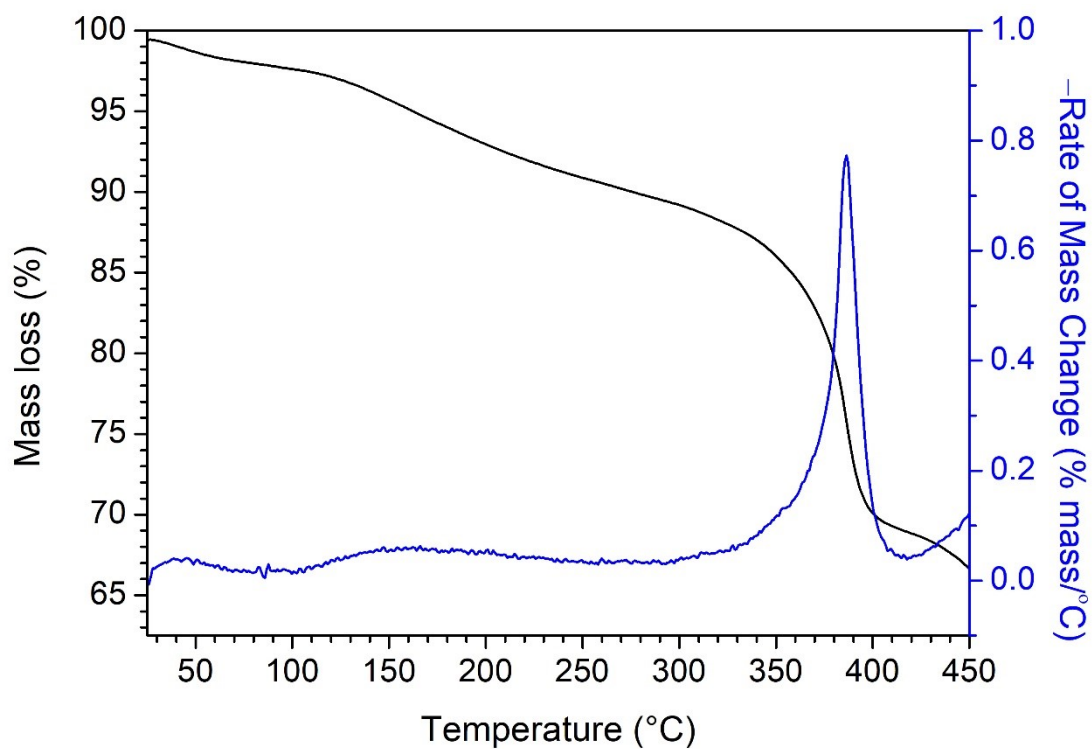

**Figure S7.** Thermal Gravimetric Analysis (TGA) of  $[\text{Cd}_2(\text{CdTCPP})(\text{bpe})(\text{H}_2\text{O})]$  (1) under  $\text{N}_2$  between 25 and 450 °C, heated at a rate of 5 °C/min.

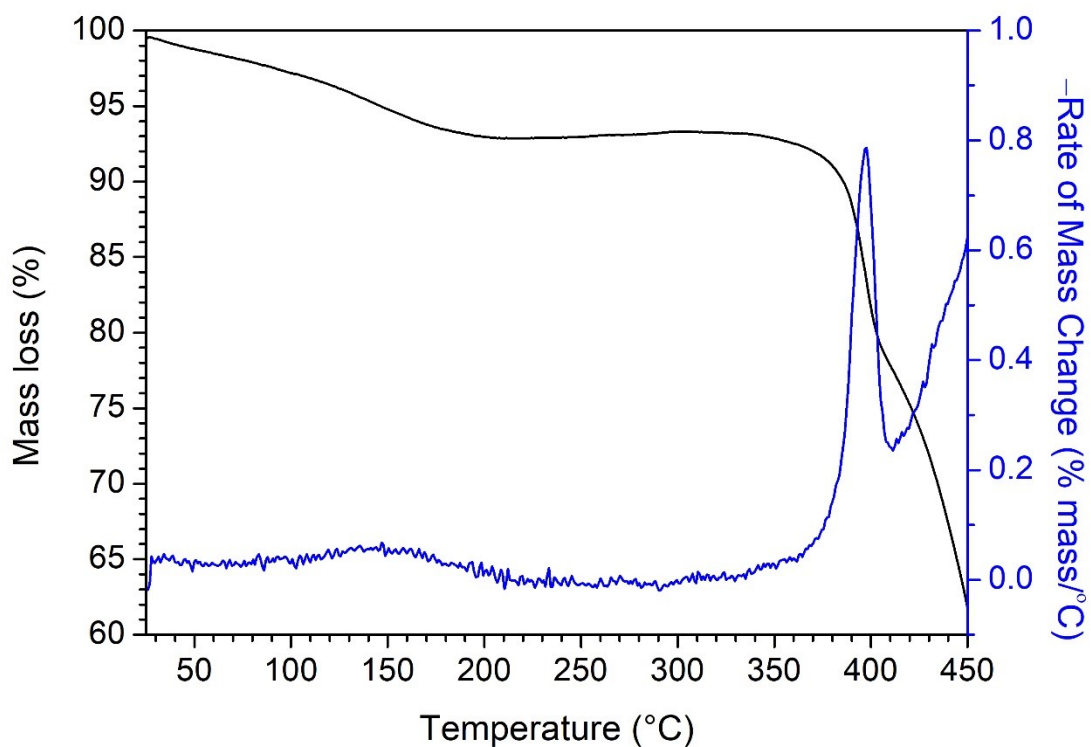

**Figure S8.** Thermal Gravimetric Analysis (TGA) of  $[\text{Cd}_2(\text{ZnTCPP})(\text{bpe})(\text{H}_2\text{O})]$  (**2**) under  $\text{N}_2$  between 25 and 450 °C, heated at a rate of 5 °C/min.

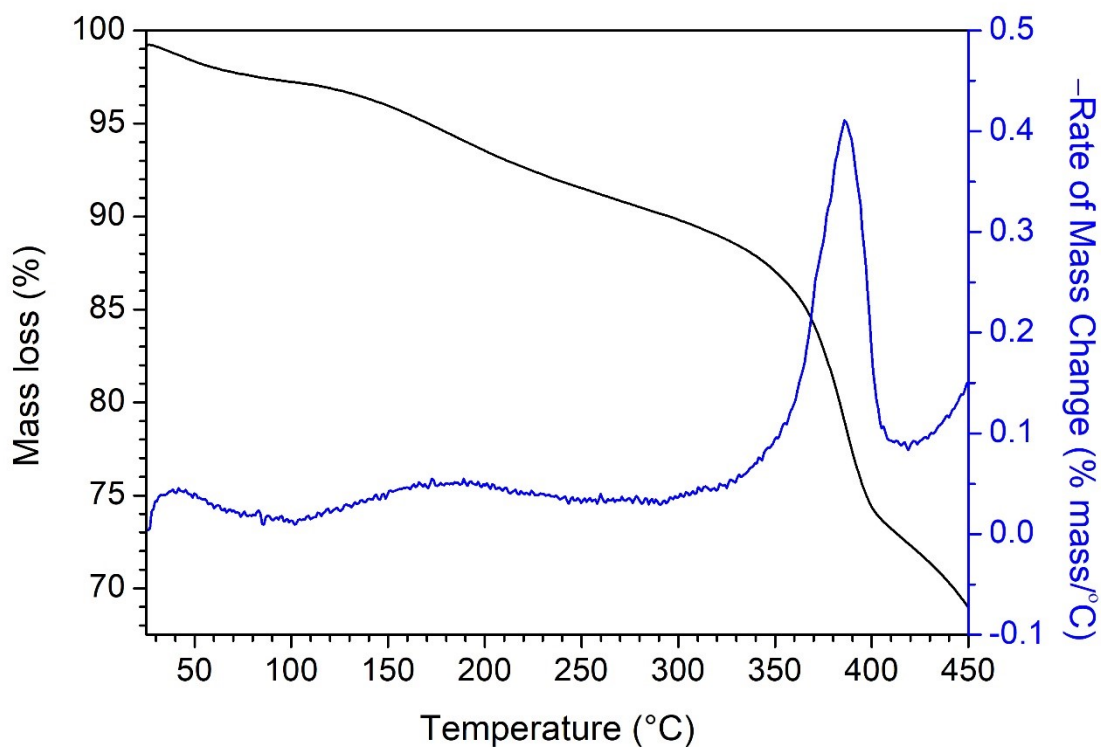

**Figure S9.** Thermal Gravimetric Analysis (TGA) of  $[\text{Cd}_2(\text{CdTCPP})(\text{bpaz})(\text{H}_2\text{O})]$  (**3**) under  $\text{N}_2$  between 25 and 450 °C, heated at a rate of 5 °C/min.

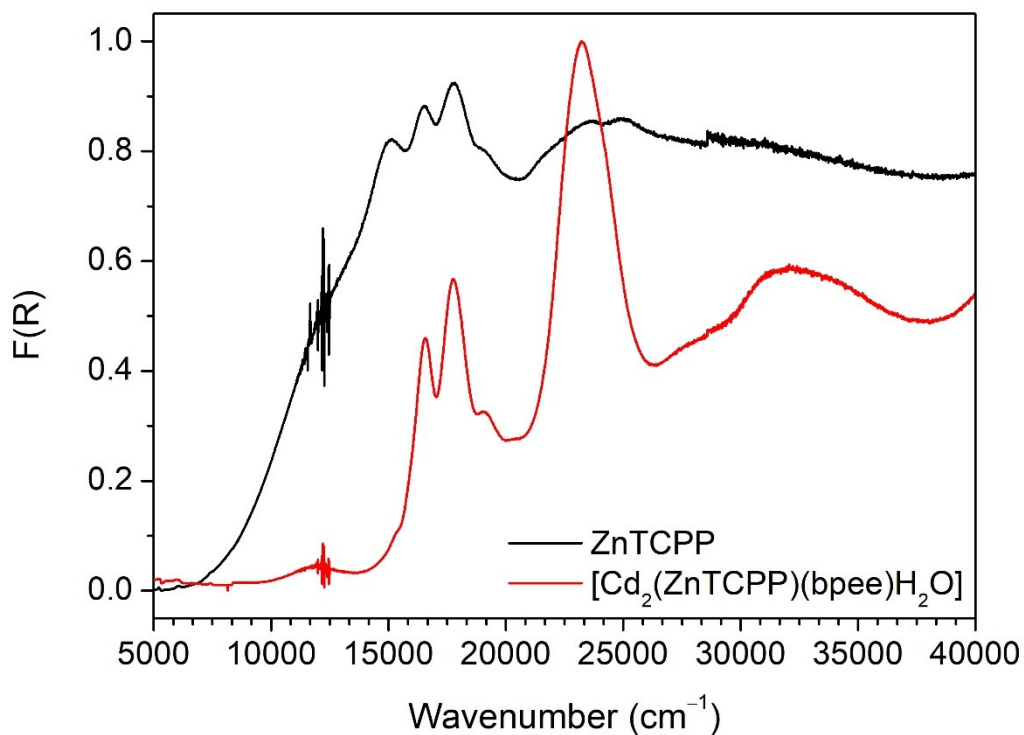

**Figure S10.** Solid state UV-Vis-NIR spectra of ZnTCPP (black) and  $[\text{Cd}_2(\text{ZnTCPP})(\text{bpee})(\text{H}_2\text{O})]$  (2) (red) between 5000 – 40000  $\text{cm}^{-1}$ .

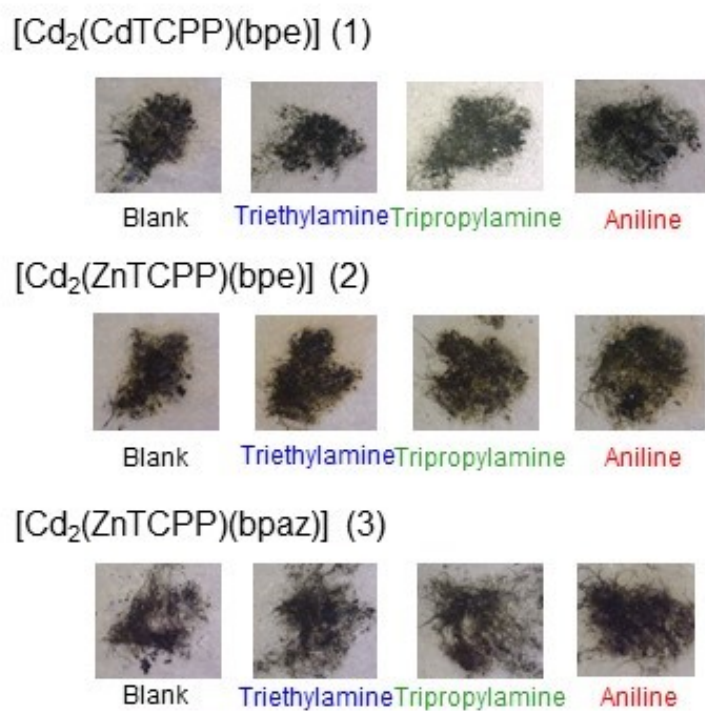

**Figure S11.** Photos of the colour change of (a)  $[\text{Cd}_2(\text{CdTCPP})(\text{bpe})]$  (1), (b)  $[\text{Cd}_2(\text{ZnTCPP})(\text{bpe})]$  (2) and (c)  $[\text{Cd}_2(\text{CdTCPP})(\text{bpaz})]$  (3) upon exposure to triethylamine, tripropylamine and aniline.



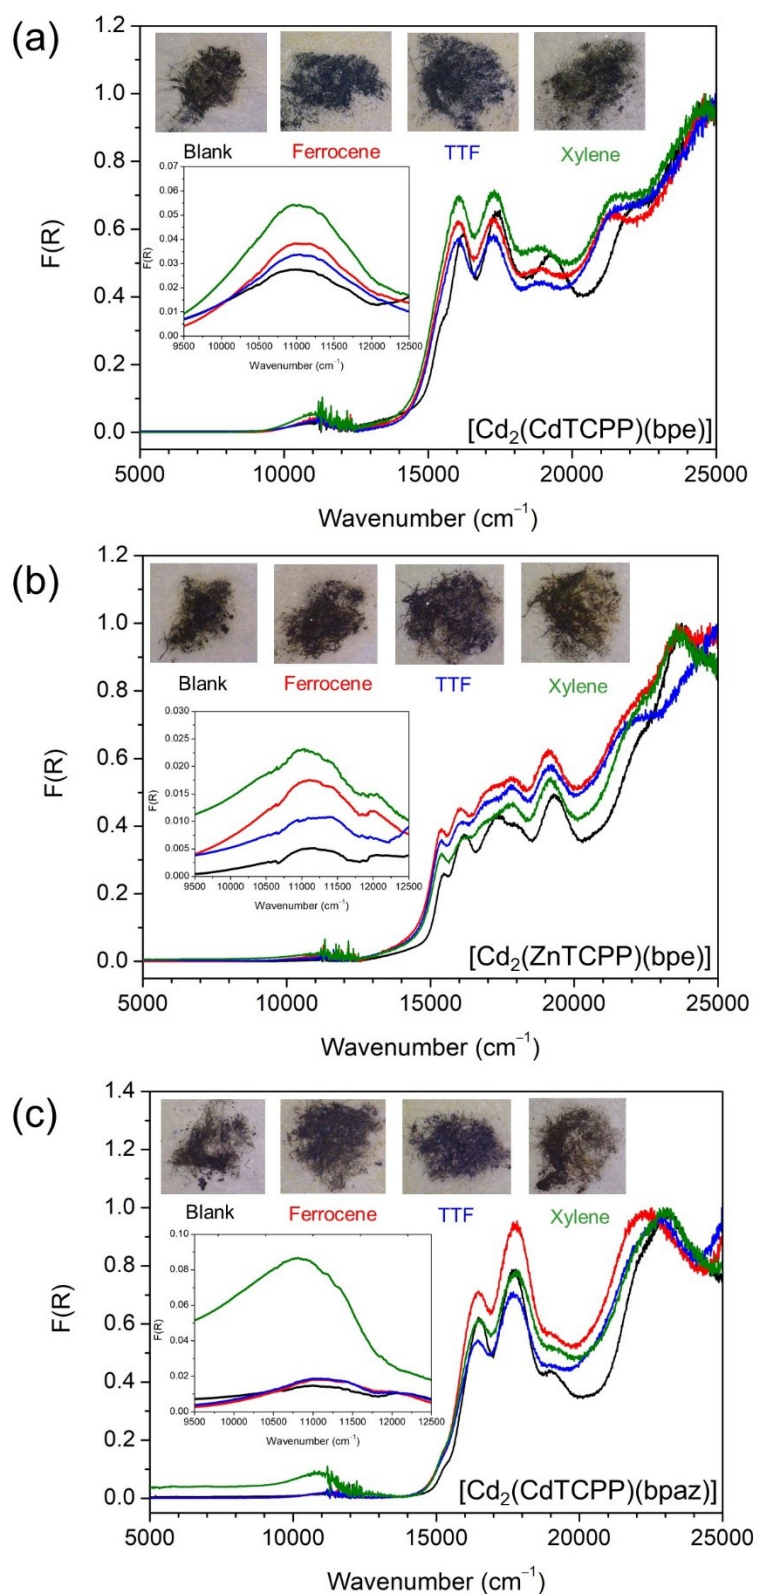

**Figure S12.** Normalised Vis-NIR spectra (black) of (a)  $[\text{Cd}_2(\text{CdTCPP})(\text{bpe})]$  (1), (b)  $[\text{Cd}_2(\text{ZnTCPP})(\text{bpe})]$  (2) and (c)  $[\text{Cd}_2(\text{CdTCPP})(\text{bpaz})]$  (3) upon exposure to ferrocene (red), TTF (blue) and xylene (green) vapour. The inset graph shows an expanded view of the NIR region and the inset photos show the colour change observed upon exposure of the framework to amine vapour.
