# Supplementary figures and images for: Three-dimensional Cd(ii) porphyrin metal–organic frameworks for the colorimetric sensing of Electron donors
Source: Royal Society of Chemistry journal article supplement (doi:10.1039/d2ce00103a), 2022-01-01

|                 | PCN-221                                                                            | PCN-224                                                                             | $[\text{Cd}_2(\text{M}^{\text{II}}\text{TCPP})(\text{dipyridyl})(\text{H}_2\text{O})]$ |
|-----------------|------------------------------------------------------------------------------------|-------------------------------------------------------------------------------------|----------------------------------------------------------------------------------------|
| $a = b$<br>axis | 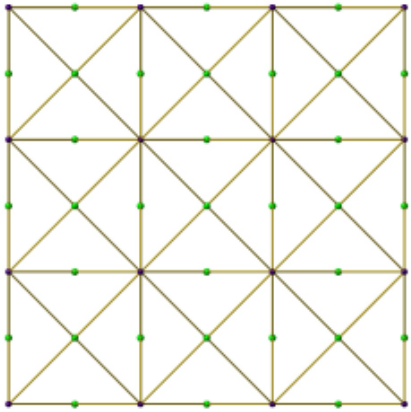  |   |     |
| c axis          |  |  |    |

Supplement: d2ce00103a2.pdf [file d2ce00103a2.pdf]
